# Supplementary material for: Reactive oxygen species-mediated CuRuOX@HA hybrid nanozymes for multidrug-resistant bacterial infections with synergistic photothermal therapy
Source: Royal Society of Chemistry journal article supplement (doi:10.1039/d3tb00787a), 2023-01-01
Supplement: d3tb00787a1.pdf [file d3tb00787a1.pdf]

### Supporting Information

#### **Reactive oxygen species-mediated CuRuO<sub>x</sub>@HA hybrid nanozyme for Multidrug Resistant-Bacterial infections with synergistic photothermal therapy**

Jiaqi Guo<sup>a</sup>, Xinyi Zhang<sup>a</sup>, Yonglan Yang<sup>a</sup>, Xufeng Zhu<sup>a</sup>, Xu Chen<sup>a</sup>, Gang Ye<sup>a\*</sup>, Jie Liu<sup>a\*</sup>

<sup>a</sup>College of Chemistry and Materials Science, The First Affiliated Hospital of Jinan University, Jinan University, Guangzhou 510632, P. R. China.

\*corresponding authors: dryegang@qq.com; tliuliu@jnu.edu.cn.

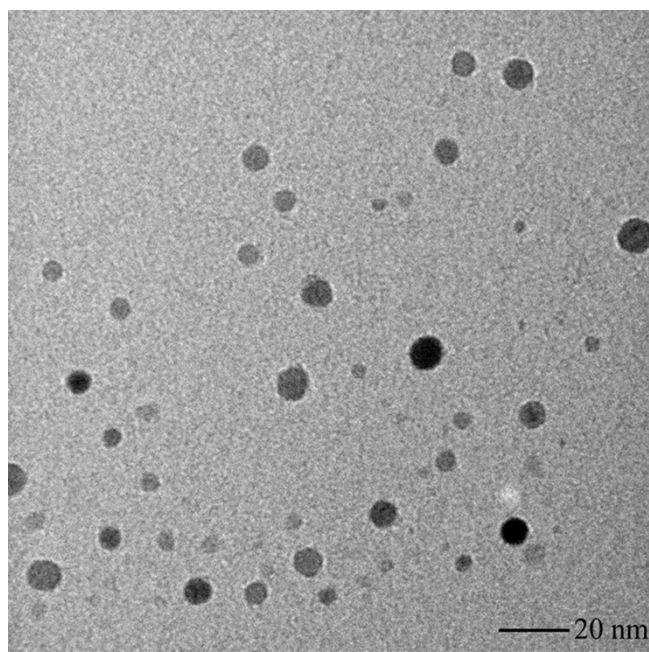

**Fig. S1** TEM image of copper-containing oxide.

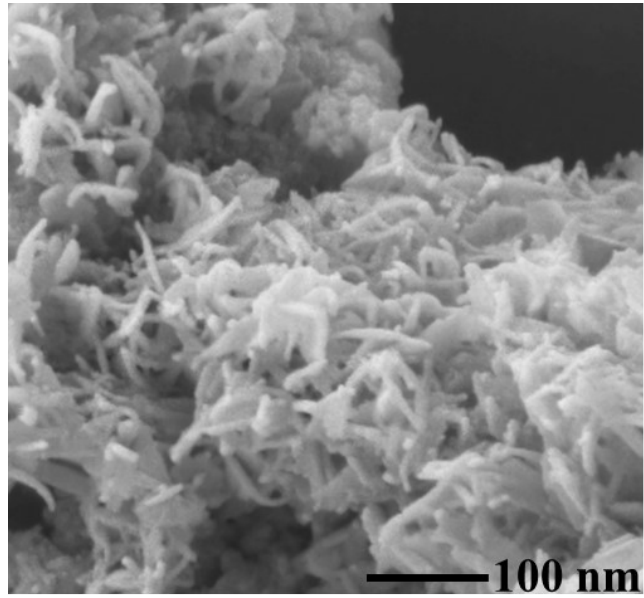

**Fig. S2** SEM image of  $\text{CuRuO}_x$  NPs.

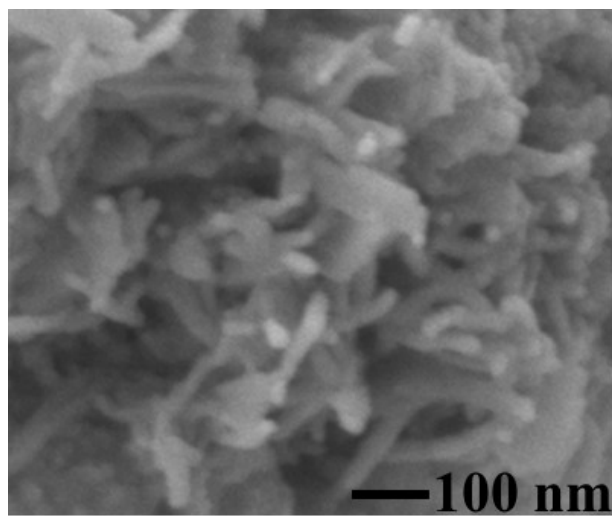

**Fig. S3** SEM image of  $\text{CuRuO}_x$ @HA NPs.

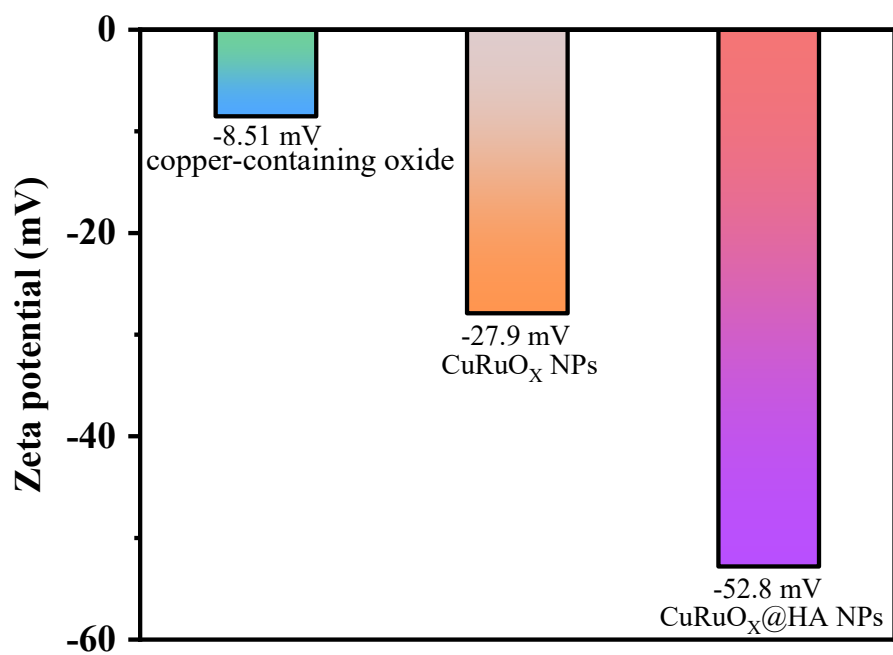

Fig. S4 Zeta potentials of copper-containing oxide, CuRuO<sub>x</sub> NPs and CuRuO<sub>x</sub>@HA NPs.

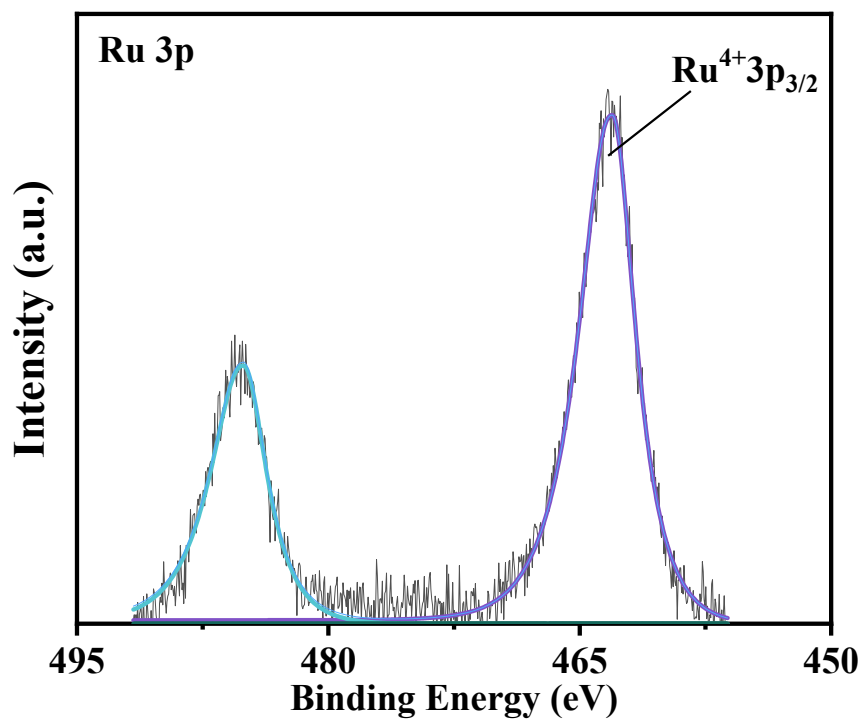

Fig. S5 Ru 3p XPS spectrum of CuRuO<sub>x</sub> NPs.

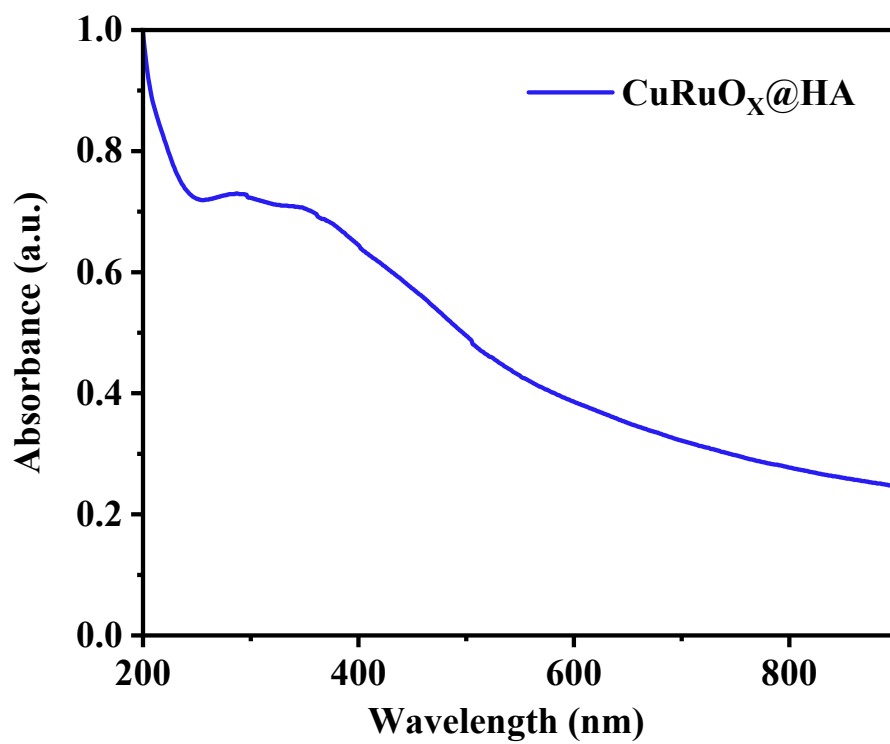

**Fig. S6** UV-vis-NIR spectrum of CuRuO<sub>x</sub>@HA NPs.

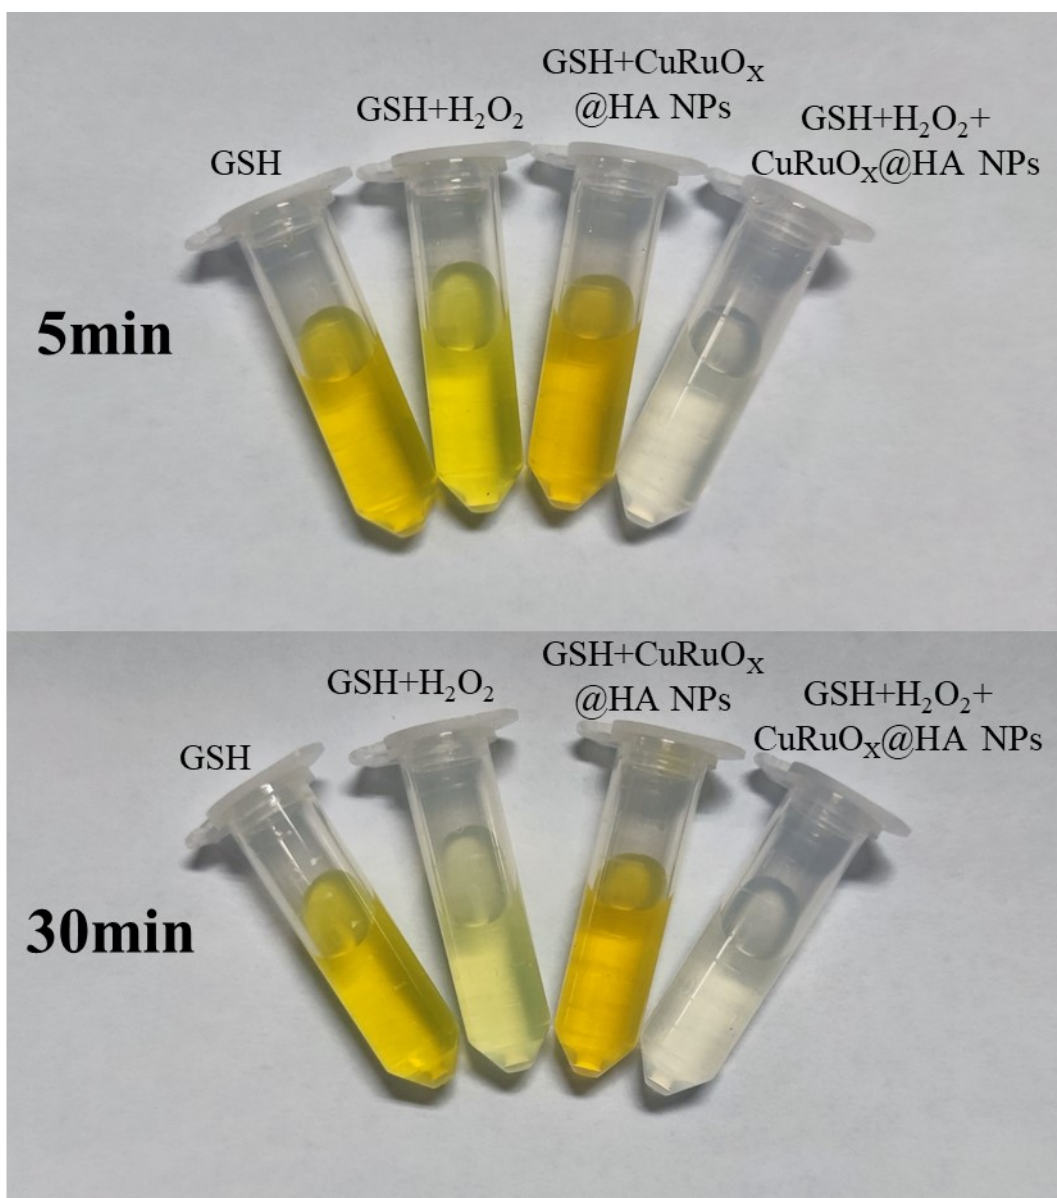

**Fig. S7** Digital photographs of GSH, GSH+H<sub>2</sub>O<sub>2</sub>, GSH+CuRuO<sub>x</sub>@HA NPs, GSH+H<sub>2</sub>O<sub>2</sub>+CuRuO<sub>x</sub>@HA NPs solutions treated by DTNB at different times.

| Catalyst                                                 | Substance                     | $K_m$ (mM) | $V_{max}$ ( $10^{-7}$ M/s) | References |
|----------------------------------------------------------|-------------------------------|------------|----------------------------|------------|
| CuRuO <sub>x</sub> @HA                                   | H <sub>2</sub> O <sub>2</sub> | 0.35       | 3.66                       | This work  |
| CuRuO <sub>x</sub> @HA                                   | TMB                           | 0.14       | 4.18                       | This work  |
| HPR                                                      | H <sub>2</sub> O <sub>2</sub> | 3.7        | 0.871                      | 1          |
| HPR                                                      | TMB                           | 0.434      | 1                          | 1          |
| MnCo <sub>2</sub> S <sub>3</sub> .1Se <sub>0.9</sub> /NF | H <sub>2</sub> O <sub>2</sub> | 8.3        | 5.55                       | 2          |
| MnCo <sub>2</sub> S <sub>3</sub> .1Se <sub>0.9</sub> /NF | TMB                           | 3.36       | 1.16                       | 2          |
| HA@MRuO <sub>2</sub> -Cip/GOx                            | H <sub>2</sub> O <sub>2</sub> | 0.13       | 0.364                      | 3          |
| HA@MRuO <sub>2</sub> -Cip/GOx                            | TMB                           | 0.08       | 0.422                      | 3          |
| QCS-RBT@RuO <sub>2</sub>                                 | H <sub>2</sub> O <sub>2</sub> | 0.11       | 1079                       | 4          |
| QCS-RBT@RuO <sub>2</sub>                                 | TMB                           | 0.146      | 1720                       | 4          |
| CuO                                                      | H <sub>2</sub> O <sub>2</sub> | 19.76      | 0.65                       | 5          |
| HM-CuO                                                   | H <sub>2</sub> O <sub>2</sub> | 0.0608     | 0.04605                    | 6          |

**Table S1.** Comparison of the kinetic parameters of CuRuO<sub>x</sub>@HA NPs with other reported nanozymes.  $K_m$  is the Michaelis-Menten constant, and  $V_{max}$  is the maximum reaction velocity.

### References

1. L. Gao, J. Zhuang, L. Nie, J. Zhang, Y. Zhang, N. Gu, T. Wang, J. Feng, D. Yang, S. Perrett and X. Yan, *Nat. Nanotechnol.*, 2007, **2**, 577-583.
2. Y. Lian, Y. Wang, D. Zhang and L. Xu, *Colloids Surf., A*, 2021, **626**, 127010.
3. X. Zhu, J. Guo, Y. Yang and J. Liu, *Small*, 2023, **19**, 2204928.
4. X. Zhu, X. Chen, Z. Jia, D. Huo, Y. Liu and J. Liu, *J. Colloid Interface Sci.*, 2021, **603**, 615-632.
5. Y. Meng, Y. Chen, J. Zhu, Y. Qi, J. Ding and W. Zhou, *Mater. Horiz.*, 2021, **8**, 972-986.
6. H. Shi, C. Ban, C. Dai, C. Li, X. Zhou, R. Xia, J. Qian and M. Cao, *J. Mater. Chem. B*, 2022, **10**, 8883-8893.
